# Supplementary material for: A Mn3O4 nanospheres@rGO architecture with capacitive effects on high potassium storage capability
Source: PubMed Central journal article supplement — Nanoscale Adv. 2019 Sep 10;1(11):4347–58. doi: 10.1039/c9na00425d (PMC9417849; doi:10.1039/c9na00425d), 2019-09-10
Supplement: NA-001-C9NA00425D-s001.pdf [file NA-001-C9NA00425D-s001.pdf]

## **Mn<sub>3</sub>O<sub>4</sub> nanospheres@rGO architecture with Capacitive Effects on the High Potassium Storage Capability**

*Chandrasekaran Nithya<sup>a\*</sup>, Palanivelu Vishnuprakash<sup>a</sup>, Sukumaran Gopukumar<sup>c</sup>*

<sup>a</sup>Department of Chemistry, PSGR Krishnammal College for Women, Coimbatore – 641 004.

<sup>b</sup>Department of Energy and Environment, National Institute of Technology, Tiruchirappalli – 620 015, India

<sup>c</sup>CSIR-Network Institute of Solar Energy, CSIR-Central Electrochemical Research Institute, Karaikudi, India 630 006

### **Supporting Information**

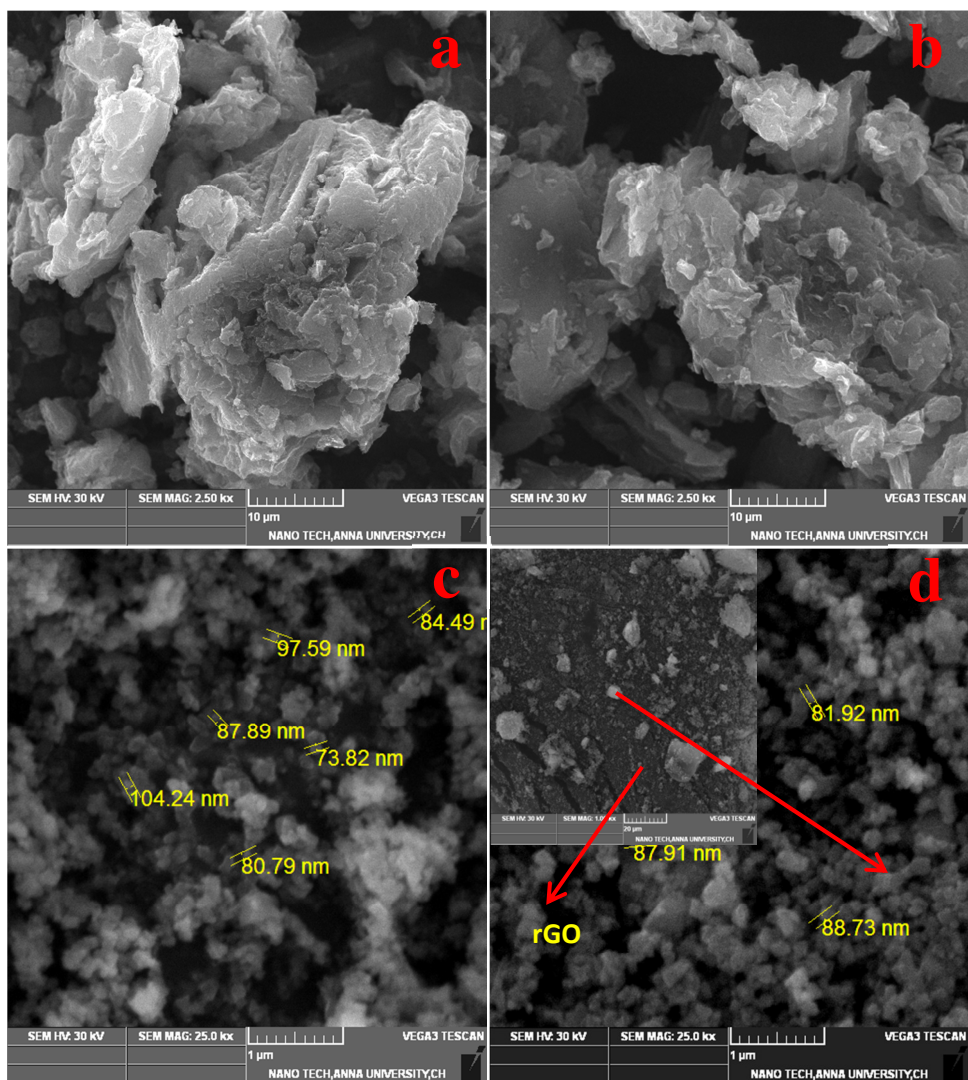

**Fig. S1** SEM images of (a) GO (b) rGO (c) Mn<sub>3</sub>O<sub>4</sub> (d) Mn<sub>3</sub>O<sub>4</sub>@rGO (Inset in Fig. d – SEM image of Mn<sub>3</sub>O<sub>4</sub>@rGO at low magnification).

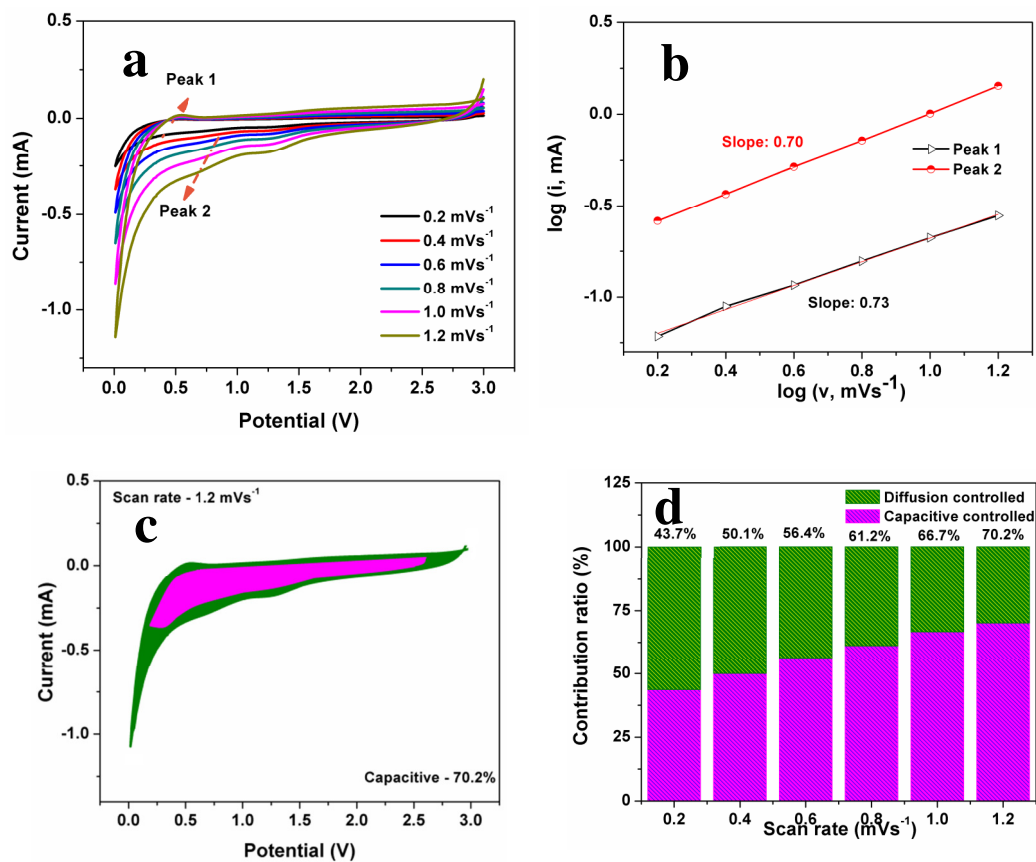

**Fig. S2** (a) CV curves of  $\text{Mn}_3\text{O}_4$  at various scan rates (b) Log  $i$  vs. log  $v$  plots at oxidation and reduction state (c) Capacitive contribution  $\text{Mn}_3\text{O}_4$  at 1.2  $\text{mVs}^{-1}$  (d) Normalized contribution ratio of capacitive and diffusion controlled capacities of  $\text{Mn}_3\text{O}_4$  at various scan rates.

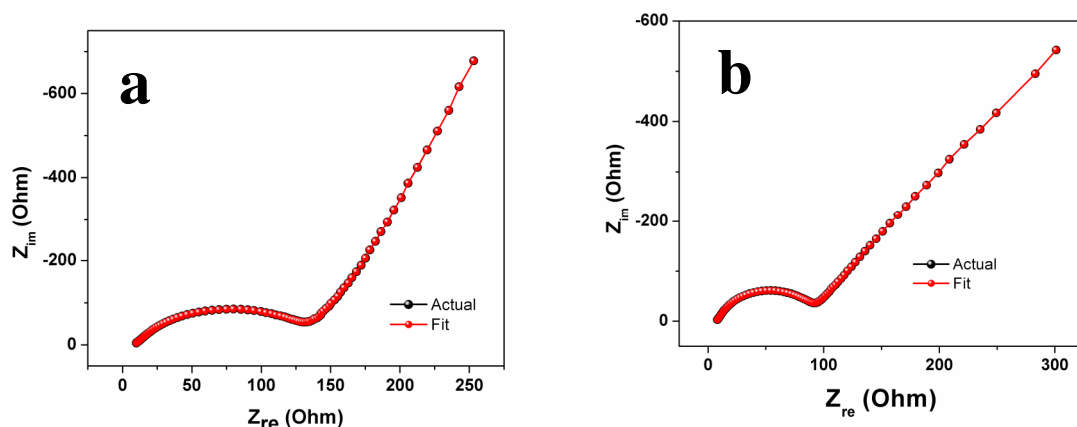

**Fig. S3** Actual and fitted Nyquist plots of (a)  $\text{Mn}_3\text{O}_4$  (b)  $\text{Mn}_3\text{O}_4@\text{rGO}$

**Table S1.** Comparison of  $\text{Mn}_3\text{O}_4$  as anode material for LIBs, NIBs and KIBs by various synthesis techniques.

| S.No. | Electrode material                                                                                               | Current density (mA/g) | Specific capacity (mAh/g) | Number of cycles | Capacity retention after $n^{\text{th}}$ cycle | Reference |
|-------|------------------------------------------------------------------------------------------------------------------|------------------------|---------------------------|------------------|------------------------------------------------|-----------|
| 1.    | $\text{Mn}_3\text{O}_4$ microsphere composed of ultrathin nanosheets (Ethanol Thermal reduction Method) for LIBs | 100                    | 640                       | 100              | 95.81                                          | [1]       |
|       |                                                                                                                  | 2000                   | 324                       | 1000             | 85.27                                          |           |
| 2.    | $\text{Mn}_3\text{O}_4$ nanoparticles with $\text{P}_{123}$ as surfactant (Solvothelmal method) for LIBs         | 100                    | 625.9                     | 75               | 44.14                                          | [2]       |
|       | $\text{Mn}_3\text{O}_4$ nanoparticles with HMTA as surfactant (Solvothelmal method) for LIBs                     | 100                    | 234.7                     | 75               | 15.57                                          |           |
| 3.    | $\text{Mn}_3\text{O}_4/\text{rGO}$ (Two step solution phase reaction) for LIBs                                   | 400                    | 780                       | 10               | 97.50                                          | [3]       |
|       |                                                                                                                  | 1600                   | 390                       | 10               | 81.25                                          |           |
|       | Pristine $\text{Mn}_3\text{O}_4$                                                                                 | 40                     | 115                       | 10               | 41.08                                          |           |

|           |                                                                                                                                                                 |            |            |            |           |                     |
|-----------|-----------------------------------------------------------------------------------------------------------------------------------------------------------------|------------|------------|------------|-----------|---------------------|
| 4.        | Sponge like Nanosized Mn <sub>3</sub> O <sub>4</sub> (Precipitation method) for LIBs                                                                            | 234        | 780        | 40         | 86.66     | [4]                 |
| 5.        | HCF/Mn <sub>3</sub> O <sub>4</sub> (HCF was prepared by acid treatment method and HCF/Mn <sub>3</sub> O <sub>4</sub> was prepared by insitu synthesis) for LIBs | 200        | 835        | 100        | 89.8      | [5]                 |
|           |                                                                                                                                                                 | 1000       | 652        | 240        | 66.52     |                     |
| 6.        | Mn <sub>3</sub> O <sub>4</sub> /C microspheres (Solvothelmal method) for LIBs                                                                                   | 200        | 1032       | 500        | 80        | [6]                 |
|           |                                                                                                                                                                 | 1000       | 848        | 500        | 78.16     |                     |
|           |                                                                                                                                                                 | 1500       | 778        | 500        | 71.71     |                     |
| 7.        | Graphene/Mn <sub>3</sub> O <sub>4</sub> (Graphene by Modified Hummer's method and Mn <sub>3</sub> O <sub>4</sub> by precipitation method) for LIBs              | 100        | 702        | 100        | 87.5      | [7]                 |
|           | Mn <sub>3</sub> O <sub>4</sub> for LIBs                                                                                                                         | 100        | 171        | 100        | 37.4      |                     |
| 8.        | Mn <sub>3</sub> O <sub>4</sub> vs LIBs (Selective dissolution method)                                                                                           | 50         | 400        | 500        | 41.67     | [8]                 |
|           | Mn <sub>3</sub> O <sub>4</sub> vs NIBs                                                                                                                          | 200        | 167        | 200        | 49.86     |                     |
|           | Mn <sub>3</sub> O <sub>4</sub> vs KIBs                                                                                                                          | 100        | 156        | 100        | 41.66     |                     |
| 9.        | Mn <sub>3</sub> O <sub>4</sub> @C (Hydrothermal reaction) for LIBs                                                                                              | 40         | 473        | 50         | 38        | [9]                 |
|           | Mn <sub>3</sub> O <sub>4</sub> for LIBs                                                                                                                         | 40         | 155        | 50         | 15.9      |                     |
| 10.       | Mn <sub>3</sub> O <sub>4</sub> /rGO (6.9wt% of rGO) (Two step chemical reaction) for LIBs                                                                       | 1000       | 540        | 100        | 73.1      | [10]                |
| <b>11</b> | <b>Mn<sub>3</sub>O<sub>4</sub>@rGO for KIBs (precipitation followed by ultrasonication)</b>                                                                     | <b>500</b> | <b>704</b> | <b>500</b> | <b>90</b> | <b>Present work</b> |

## References

1. L. Xu, X. Chen, L. Zeng, R. Liu, C. Zheng, Q. Qian, Q. Chen “Synthesis of hierarchical  $\text{Mn}_3\text{O}_4$  microsphere composed of ultrathin nanosheets and its excellent long-term cycling performance for lithium-ion batteries” *J. Mater. Sci. Mater. Electron.* 2019, **30**, 3055-3060
2. Y. Yang, S. Yang, C. Feng, H. Zheng, Q. Xia “Solvothermal synthesis of  $\text{Mn}_3\text{O}_4$  as an anode material for lithium ion batteries” *J. Electroceram.* **2018** <https://doi.org/10.1007/s10832-018-0171-9>
3. H. Wang, L. Cui, Y. Yang, H. S. Casolongue, J. T. Robinson, Y. Liang, Y. Cui, H. Dai “ $\text{Mn}_3\text{O}_4$ -Graphene Hybrid as a High-Capacity Anode Material for Lithium Ion Batteries” *J. Am. Chem. Soc.* 2010, **132**, 13978-13980.
4. J. Gao, M. A. Lowe, H. D. Abruna “Sponge like nanosized  $\text{Mn}_3\text{O}_4$  as a high-capacity anode material for rechargeable lithium batteries” *Chem. Mater.* 2011, **23**, 3223-3227.
5. D. Zhang, G. Li, J. Fan, B. Li, L. Li “In situ synthesis of  $\text{Mn}_3\text{O}_4$  nanoparticles on hollow carbon nanofiber as high-performance lithium-ion battery anode” *Chem. Eur. J.* 2018, **24**, 9632-9638.
6. H. J. Peng, G. X. Hao, Z. H. Chu, J. Lin, X. M. Lin, Y. P. Cai “Mesoporous  $\text{Mn}_3\text{O}_4/\text{C}$  Microspheres fabricated from MOF template as advanced Lithium-Ion battery anode” *Cryst. growth and des.* 2017, **17**, 5881-5886.
7. J. G. Wang, D. Jin, R. Zhou, X. Li, X. R. Liu, C. Shen, K. Xie, B. Li, F. Kang, B. Wei “Highly flexible Graphene/ $\text{Mn}_3\text{O}_4$  Nanocomposite membrane as advanced anodes for Li-Ion Batteries” *ACS Nano* 2016, **10**, 6227-6234.
8. C. Tang, F. Xiong, X. Yao, S. Tan, B. Lan, Q. An, P. Luo, L. Mai “Hierarchical  $\text{Mn}_3\text{O}_4$ /Graphene Microflowers Fabricated via a selective dissolution strategy for Alkali-Metal-Ion Storage” *ACS Appl. Mater. Interfaces* 2019, **11**, 14120-14125.

9. C. Wang, L. Yin, D. Xiang, Y. Qi “Uniform carbon layer coated Mn<sub>3</sub>O<sub>4</sub> Nanorod anodes with improved reversible capacity and cyclic stability for Lithium Ion Batteries” *ACS Appl. Mater. Interfaces* 2012, **4**, 1636-1642.

10. S. Li, L. L. Yu, Y. T. Shi, J Fan, R. B. Li, G. D. Fan, W. L. Xu, J. T. Zhao “Greatly enhanced faradic capacities of 3D porous Mn<sub>3</sub>O<sub>4</sub>/G composites as Lithium-Ion Anodes and supercapacitors by C-O-Mn bonding” *ACS Appl. Mater. Interfaces* 2019, **11**, 10178-10188.

**Table S2.** The fitting results of electrochemical impedance spectroscopy of the rGO, pristine Mn<sub>3</sub>O<sub>4</sub> and Mn<sub>3</sub>O<sub>4</sub>@rGO composite

| <b>Material</b>                     | <b>R<sub>s</sub> (Ω)</b> | <b>R<sub>sf</sub><br/>(Ω)</b> | <b>R<sub>CT</sub><br/>(Ω)</b> | <b>C<sub>dl</sub><br/>(mF)</b> |
|-------------------------------------|--------------------------|-------------------------------|-------------------------------|--------------------------------|
| rGO                                 | 1.10                     | 7.2                           | 133.1                         | 36.7                           |
| Mn <sub>3</sub> O <sub>4</sub>      | 9.95                     | 20.2                          | 155.3                         | 18.2                           |
| Mn <sub>3</sub> O <sub>4</sub> @rGO | 8.04                     | 9.8                           | 92.7                          | 55.2                           |
